# Supplementary material for: Implementation of Glycan Remodeling to Plant-Made Therapeutic Antibodies
Source: PubMed Central journal article supplement (PMC5855643; doi:10.3390/ijms19020421), 2018-01-31
Supplement: ijms-19-00421-s001.pdf [file ijms-19-00421-s001.pdf]

# Supplementary Materials: Implementation of Glycan Remodeling to Plant-Made Therapeutic Antibodies

**Table S1.** Summary of plant-made rituximab heavy chain amino acid modifications detected by LC/MS

|      | Oxidation | Deamidation | N-terminal<br>pyroglutamate | C-terminal<br>Lysine loss |
|------|-----------|-------------|-----------------------------|---------------------------|
| M469 | <0.1%     | -           | -                           | -                         |
| Q1   | -         | -           | >99.9%                      | -                         |
| N268 | -         | >99.9%      | -                           | -                         |
| N503 | -         | 4.5%        | -                           | -                         |
| N532 | -         | >99.9%      | -                           | -                         |
| N578 | -         | <0.1%       | -                           | -                         |
| N601 | -         | 45.6%       | -                           | -                         |
| K664 | -         | -           | -                           | -                         |

**Table S2.** Summary of plant-made rituximab light chain amino acid modifications detected by LC/MS

|      | Oxidation | Deamidation | N-terminal<br>pyroglutamate |
|------|-----------|-------------|-----------------------------|
| Q1   | -         | -           | 98.8%                       |
| N136 | -         | 41.67%      | -                           |
| N137 | -         | 5.5%        | -                           |

**Table S3.** Calculated masses of unglycosylated plant-made rituximab heavy and light chain based on the observed modifications. <sup>1</sup>plant-made rituximab has a valine residue at position 219 instead of an alanine residue as found on Rituxan®.

|                                                                                | Heavy chain  | Light chain |
|--------------------------------------------------------------------------------|--------------|-------------|
| Theoretical mass (unglycosylated) <sup>1</sup>                                 | 49,242.5     | 23,056.7    |
| N-term glutamine cyclization                                                   | -17 Da       | -17 Da      |
| Deamidation                                                                    | +2.5 Da      | +0.5 Da     |
| Heavy chain C-term Lysine clipping                                             | Not observed | N/A         |
| Heavy chain intra- and intermolecular disulfide bonds<br>(Cysteine n = 11)     | -11 Da       | /           |
| Light chain intramolecular disulfide bonds (Cysteine n = 5)                    | /            | -5 Da       |
| Expected mass of modified chain                                                | 49,217 Da    | 23,035.2 Da |
| Calculated mass of unglycosylated antibody <sub>Nb</sub> RTX <sup>0</sup>      | 144,504.4 Da |             |
| Calculated mass of deglycosylated antibody <sub>Nb</sub> RTX <sup>GlcNAc</sup> | 144,910.4 Da |             |

**Table S4.** Representation of A2G2 glycan structure

| Oxford glycan name | Glycan structure |
|--------------------|------------------|
| A2G2               |                  |

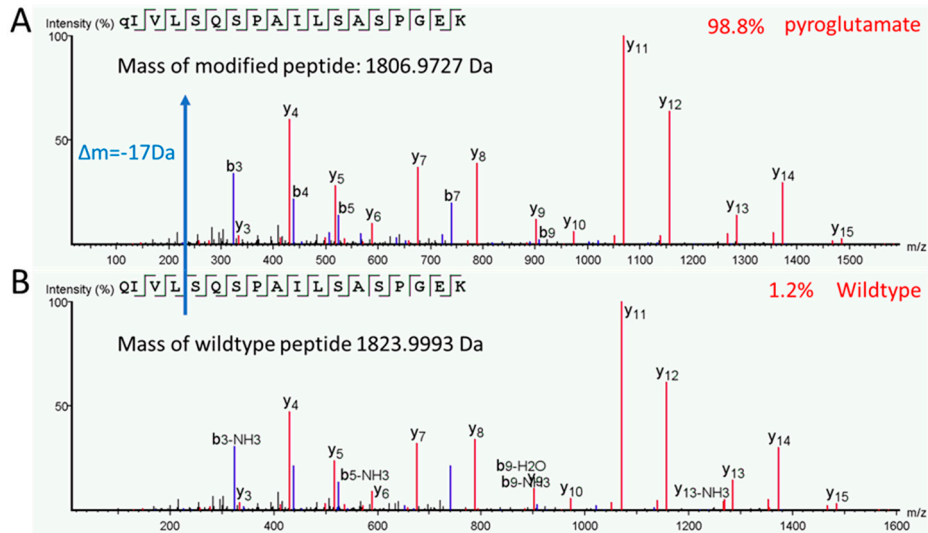

**Figure S1.** Comparison of the MS/MS spectrum of wildtype and modified peptide  $^1$ QIVLSQSPAILSASPGEK<sup>18</sup>. A) MS/MS spectrum of N-terminal pyroglutamate peptide. B) MS/MS spectrum of wildtype peptide. The mass shift (17Da) of the modified peptide from the wildtype peptide is consistent with an N-terminal pyroglutamate modification. The MS/MS fragmentation pattern of both peptides confirmed the primary sequences. The percentage of N-terminal pyroglutamate peptide was calculated based on MS peak area.

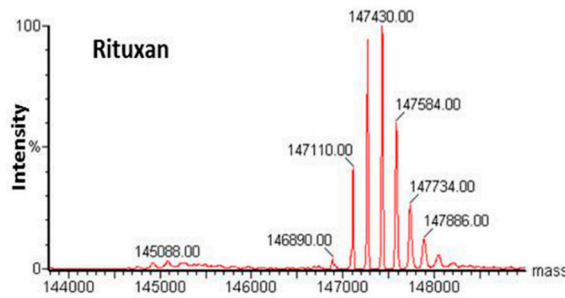

**Figure S2.** NanoLC-QTOF-MS analysis of innovator protein Rituxan®. Deconvoluted ESI-mass spectrum of Rituxan® analyzed under non-reducing conditions showing a pattern of glycosylated forms (calculated  $m/z$  of PNGase-F treated Rituxan® 144,190 Da [1])

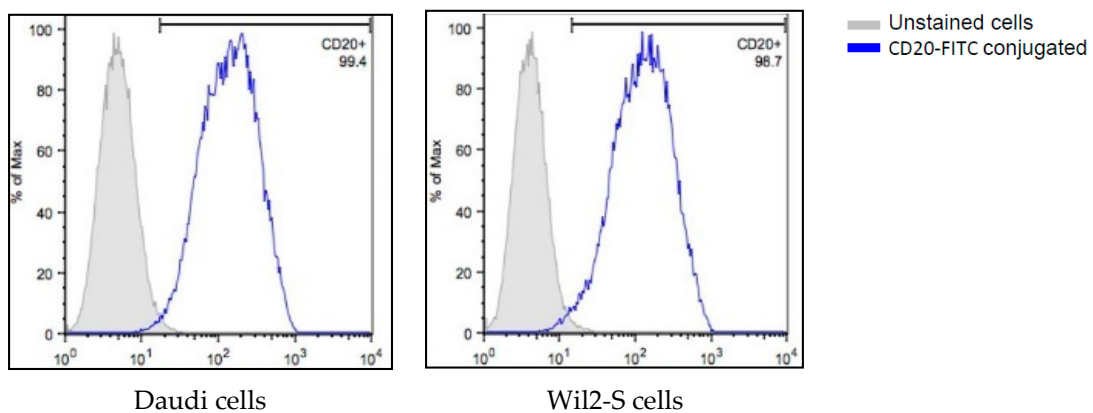

**Figure S3:** Flow cytometry analysis of CD20 expression on the surface of Wil2-S and Daudi cells. Percentage of CD20 expression is given (upper right corner on each spectrum) and unstained cells are used as control. Fluorescein isothiocyanate (FITC)-conjugated mouse anti-human Fc (blue lines) along with unstained cells (gray solid) are used for the analysis. The X-axis represents the fluorescent signals of FITC whereas the Y-axis presents % of cell count.

## Reference

1. Beck, A.; Diemer, H.; Ayoub, D.; Debaene, F.; Wagner-Rousset, E.; Carapito, C.; van Dorselaer, A.; Sanglier-Cianférani, S. Analytical characterization of biosimilar antibodies and Fc-fusion proteins. *TrAC - Trends Anal. Chem.* **2013**, *48*, 81–95.
